# Supplementary material
Source: PubMed Central journal article supplement (PMC3326418)
Supplement: NIHMS368173-supplement-Supplementary_Material.pdf [file NIHMS368173-supplement-Supplementary_Material.pdf]

## Supplementary Material

**Supplementary Figure 1.** Maximum likelihood tree of the HA1 domain of influenza B virus. Bootstrap values >70% are shown next to appropriate nodes. The major 'Vic87' and 'Yam88' lineages are also shown. The tree is mid-pointed rooted for purposes of clarity only, and all horizontal branch lengths are drawn to a scale of nucleotide substitutions per site. Branches are color-coded according to Figure 1.

**Supplementary Figure 2.** Maximum likelihood tree of the NA gene segment of influenza B virus. Bootstrap values >70% are shown next to appropriate nodes. Two major viral lineages – I and II – are indicated. Because of frequent reassortment, their correspondence to the Vic87 and Yam88 cannot be assigned with certainty. The tree is mid-pointed rooted for purposes of clarity only, and all horizontal branch lengths are drawn to a scale of nucleotide substitutions per site. Branches are color-coded according to Figure 1.

**Supplementary Figure 3.** Maximum likelihood tree of the PB2 gene segment of influenza B virus. Bootstrap values >70% are shown next to appropriate nodes. Two major viral lineages – I and II – are indicated. Because of frequent reassortment, their correspondence to the Vic87 and Yam88 cannot be assigned with certainty. The tree is mid-pointed rooted for purposes of clarity only, and all horizontal branch lengths are drawn to a scale of nucleotide substitutions per site. Branches are color-coded according to Figure 1.

**Supplementary Figure 4.** Maximum likelihood tree of the PB1 gene segment of influenza B virus. Bootstrap values >70% are shown next to appropriate nodes. Two major viral lineages – I and II – are indicated. Because of frequent reassortment, their correspondence to the Vic87 and Yam88 cannot be assigned with certainty. The tree is mid-pointed rooted for purposes of

clarity only, and all horizontal branch lengths are drawn to a scale of nucleotide substitutions per site. Branches are color-coded according to Figure 1.

**Supplementary Figure 5.** Maximum likelihood tree of the PA gene segment of influenza B virus. Bootstrap values >70% are shown next to appropriate nodes. Two major viral lineages – I and II – are indicated. Because of frequent reassortment, their correspondence to the Vic87 and Yam88 cannot be assigned with certainty. The tree is mid-pointed rooted for purposes of clarity only, and all horizontal branch lengths are drawn to a scale of nucleotide substitutions per site. Branches are color-coded according to Figure 1.

**Supplementary Figure 6.** Maximum likelihood tree of the NP gene segment of influenza B virus. Bootstrap values >70% are shown next to appropriate nodes. Two major viral lineages – I and II – are indicated. Because of frequent reassortment, their correspondence to the Vic87 and Yam88 cannot be assigned with certainty. The tree is mid-pointed rooted for purposes of clarity only, and all horizontal branch lengths are drawn to a scale of nucleotide substitutions per site. Branches are color-coded according to Figure 1.

**Supplementary Figure 7.** Maximum likelihood tree of the M1 gene of influenza B virus. Bootstrap values >70% are shown next to appropriate nodes. Two major viral lineages – I and II – are indicated. Because of frequent reassortment, their correspondence to the Vic87 and Yam88 cannot be assigned with certainty. The tree is mid-pointed rooted for purposes of clarity only, and all horizontal branch lengths are drawn to a scale of nucleotide substitutions per site. Branches are color-coded according to Figure 1.

**Supplementary Figure 8.** Maximum likelihood tree of the NS1 gene of influenza B virus. Bootstrap values >70% are shown next to appropriate nodes. Two major viral lineages – I and

II – are indicated. Because of frequent reassortment, their correspondence to the Vic87 and Yam88 cannot be assigned with certainty. The tree is mid-pointed rooted for purposes of clarity only, and all horizontal branch lengths are drawn to a scale of nucleotide substitutions per site. Branches are color-coded according to Figure 1.

Supplementary Figure 1

HA1

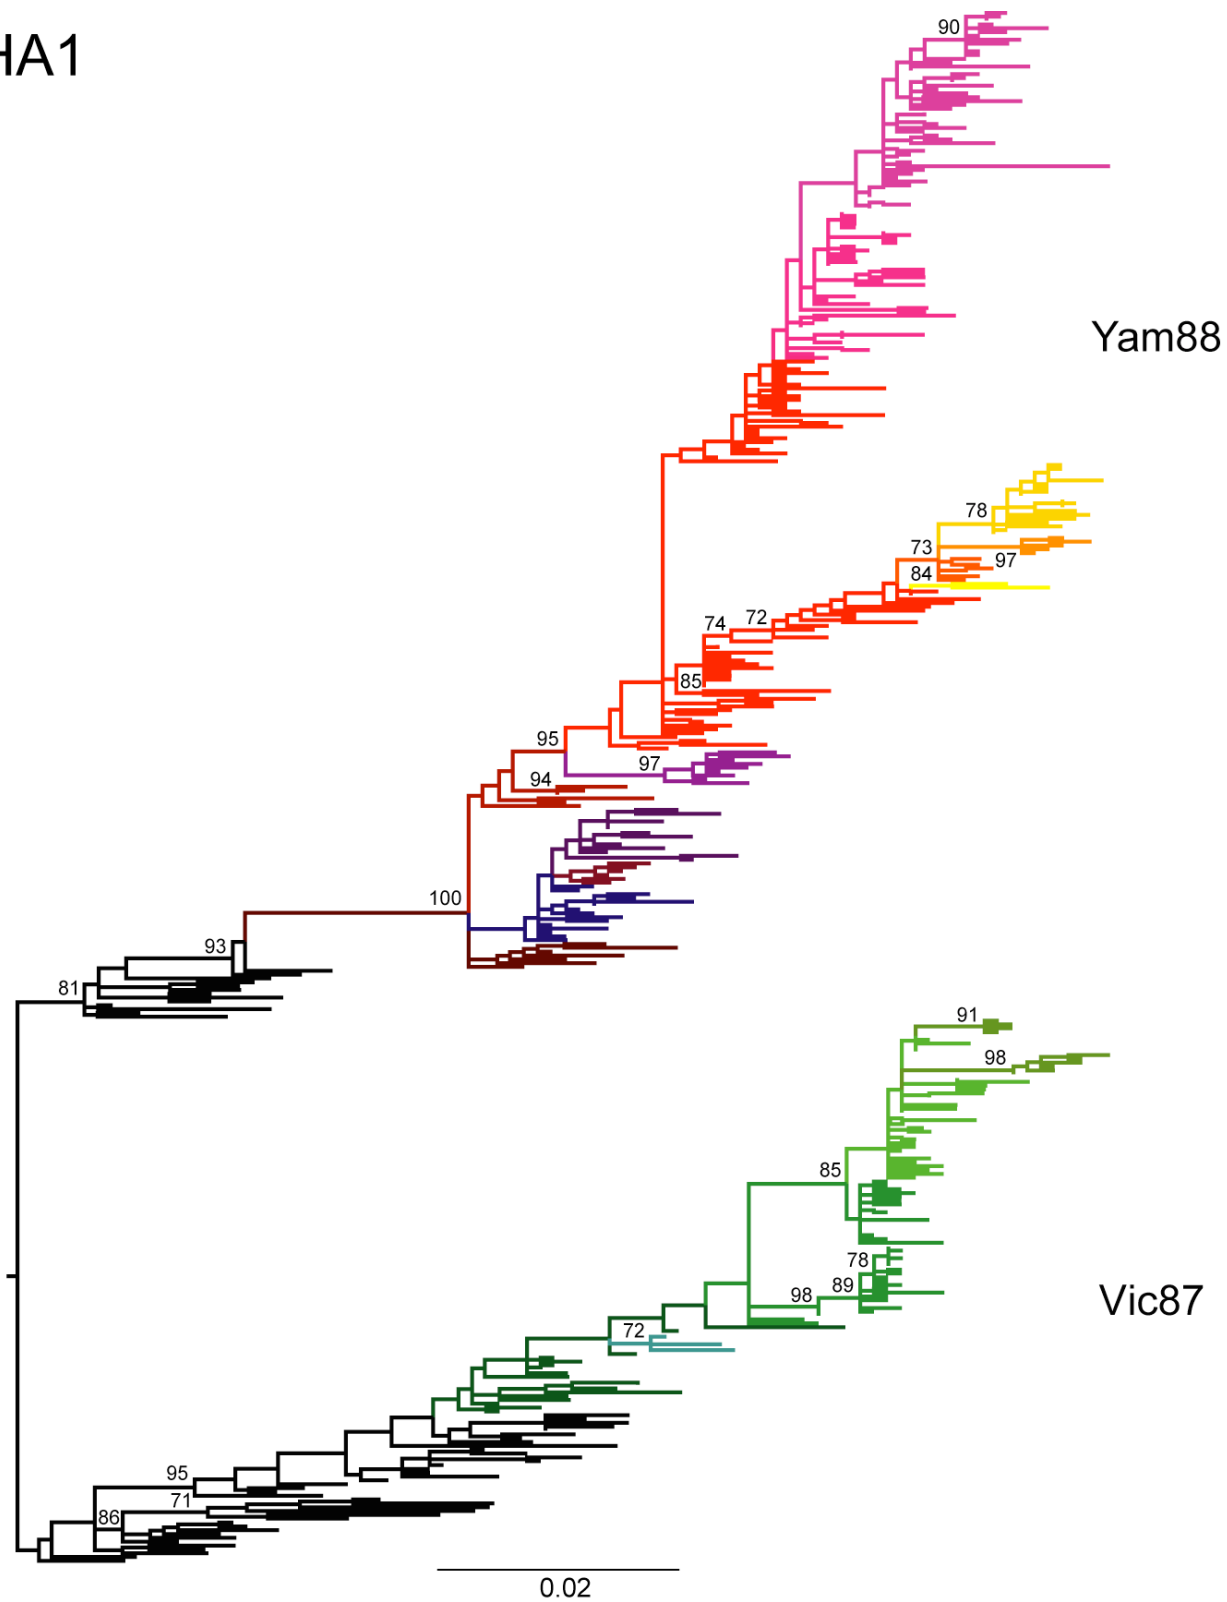

Supplementary Figure 2

NA

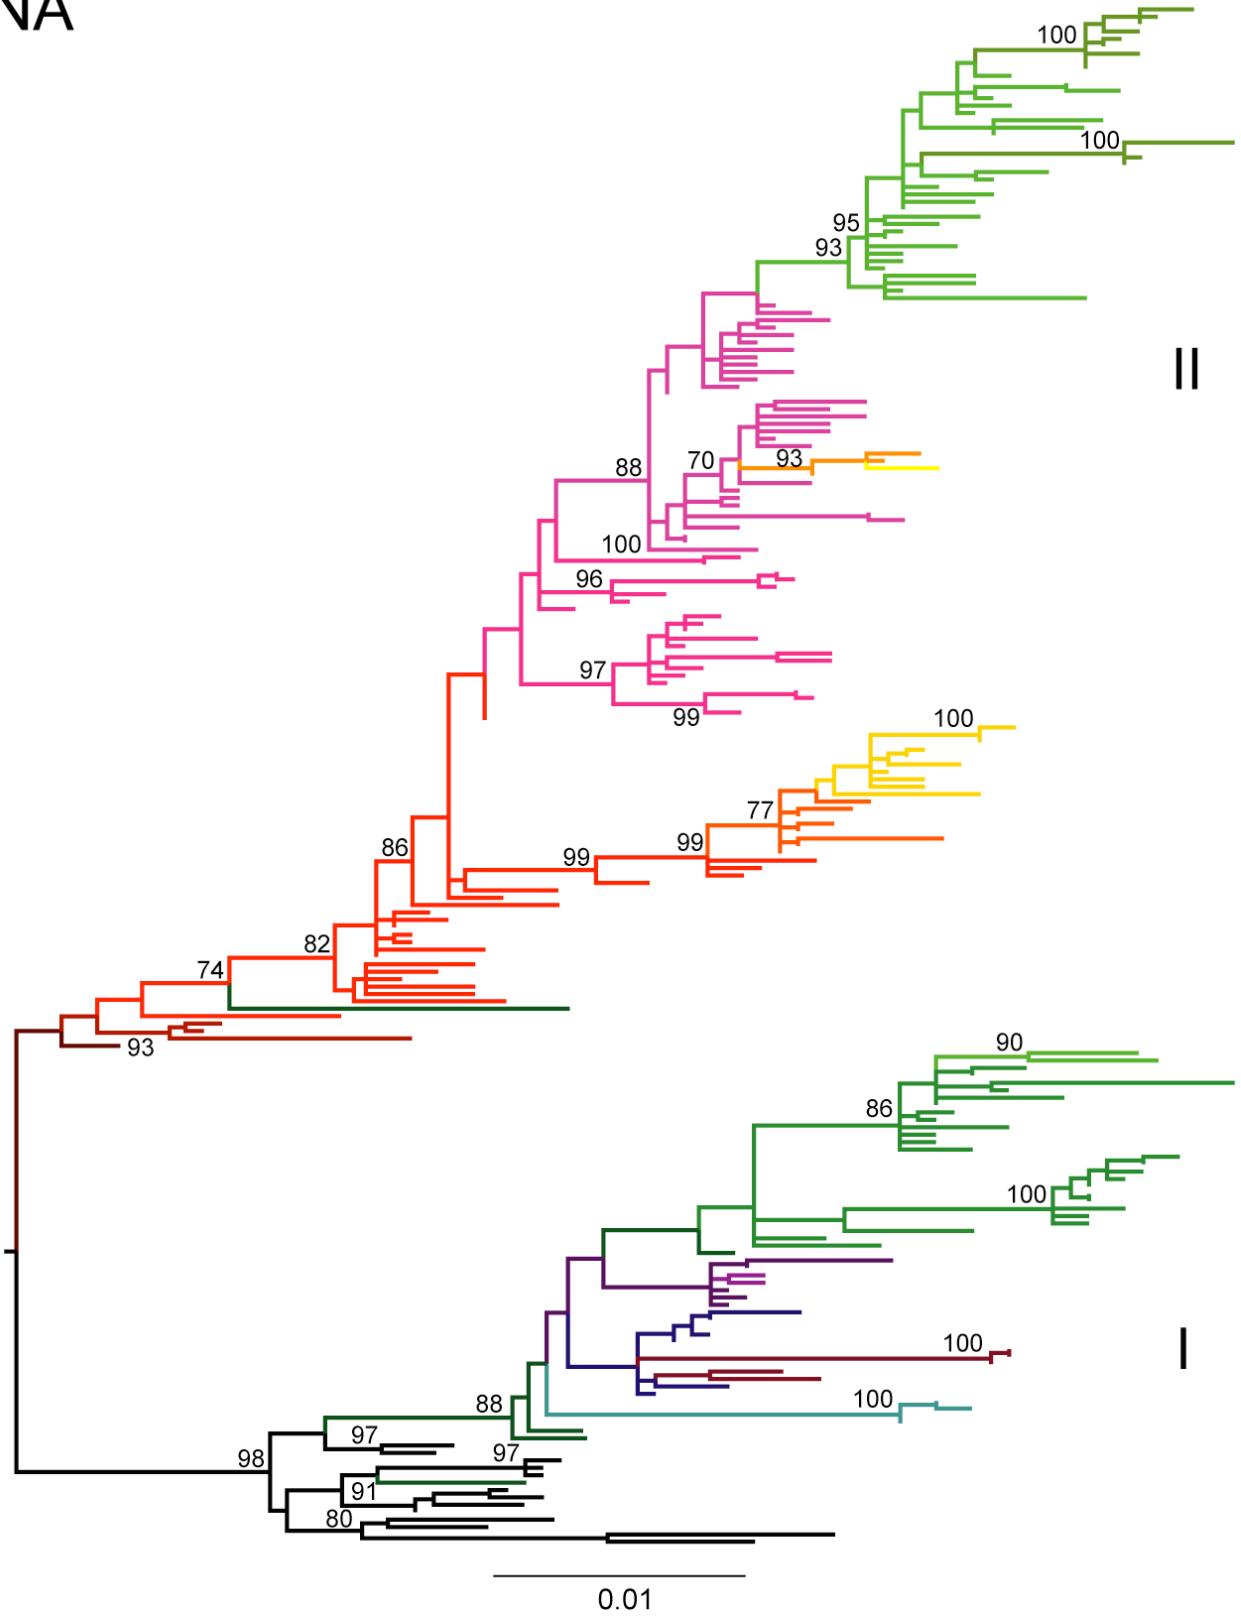

Supplementary Figure 3

# PB2

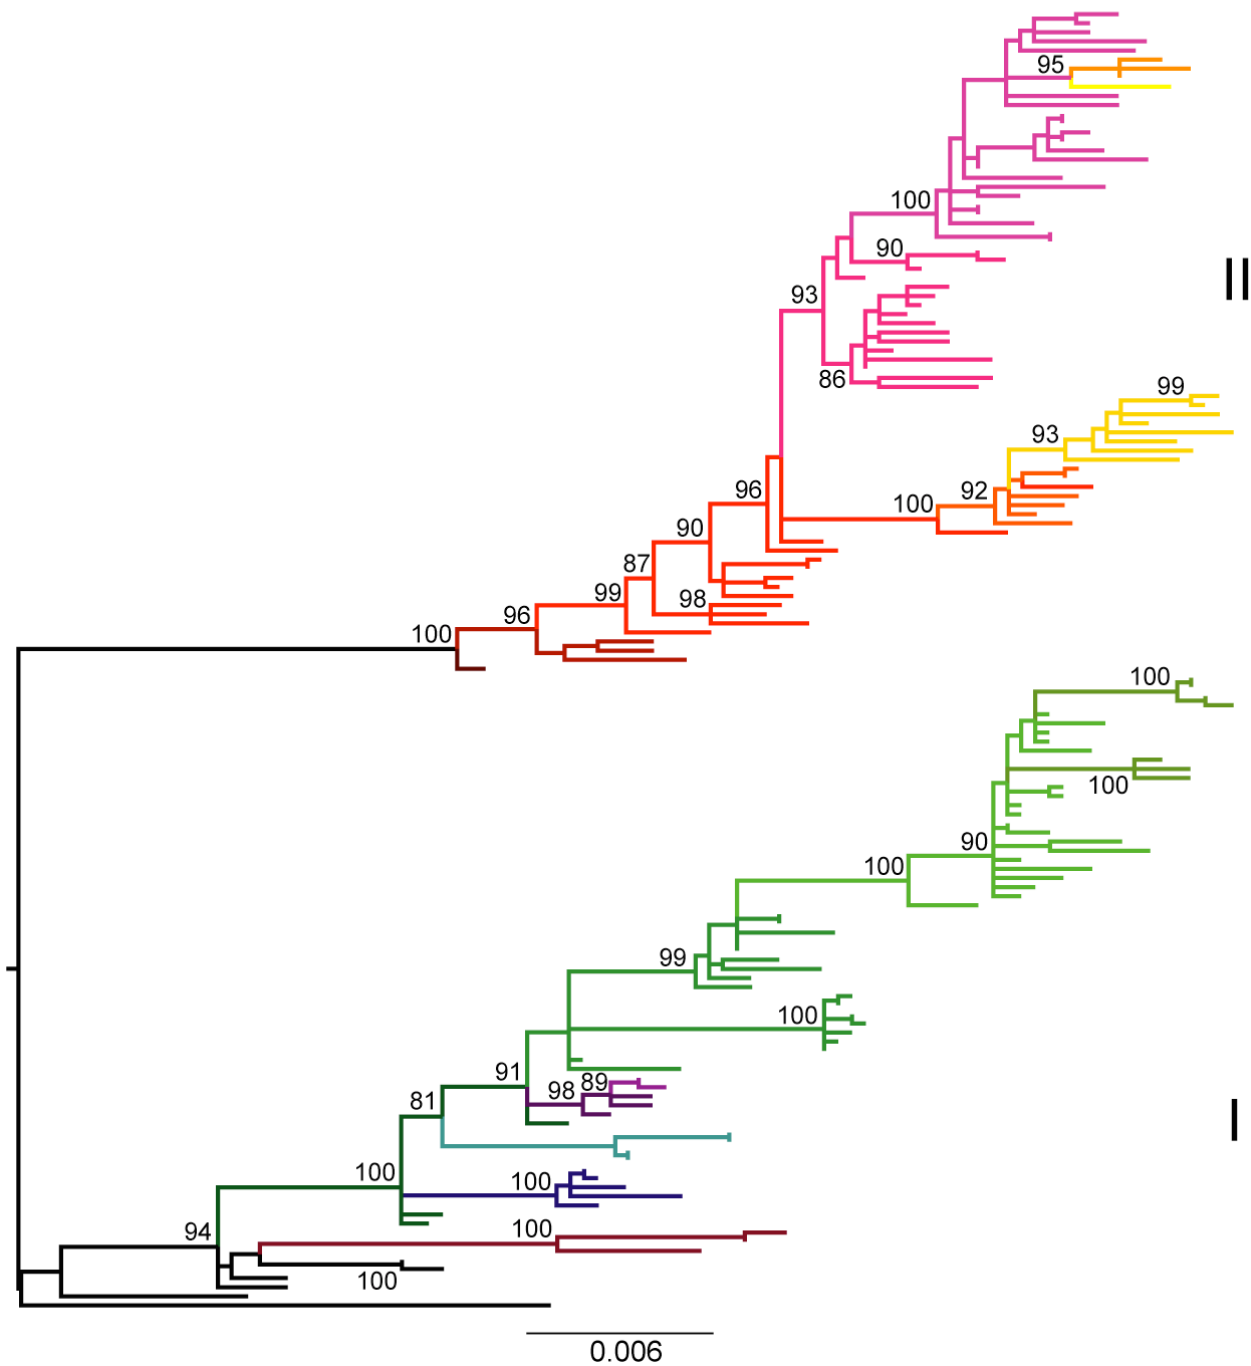

Supplementary Figure 4

# PB1

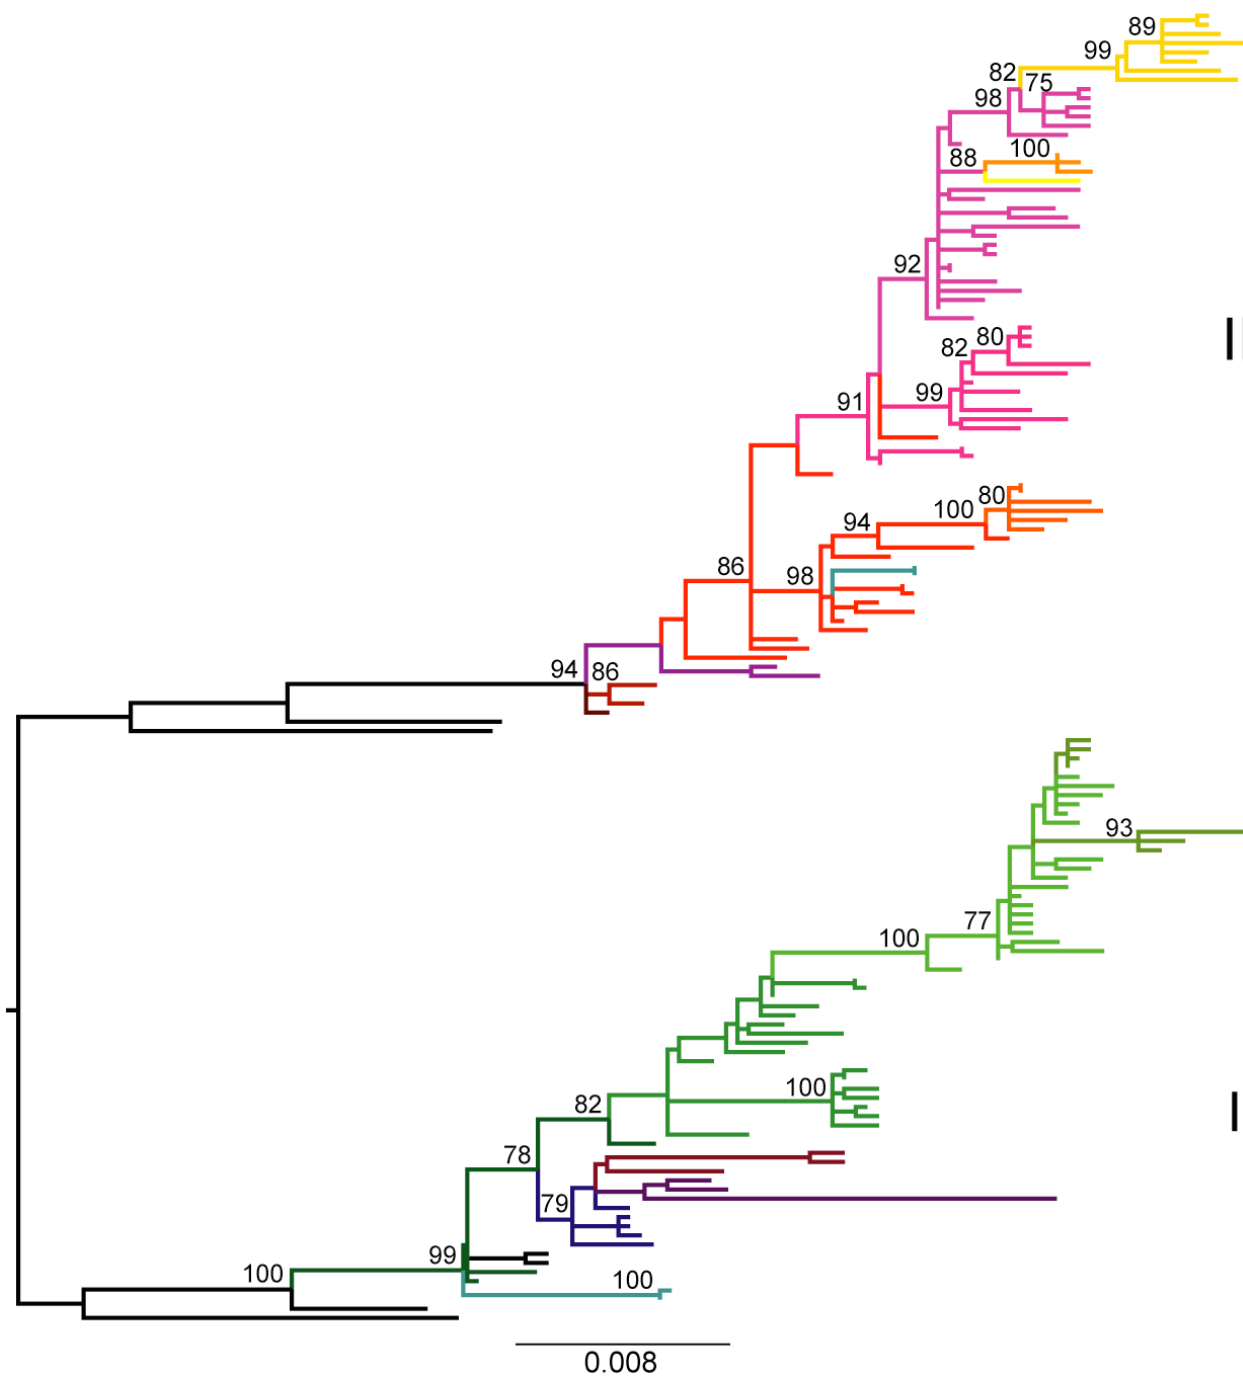

Supplementary Figure 5

PA

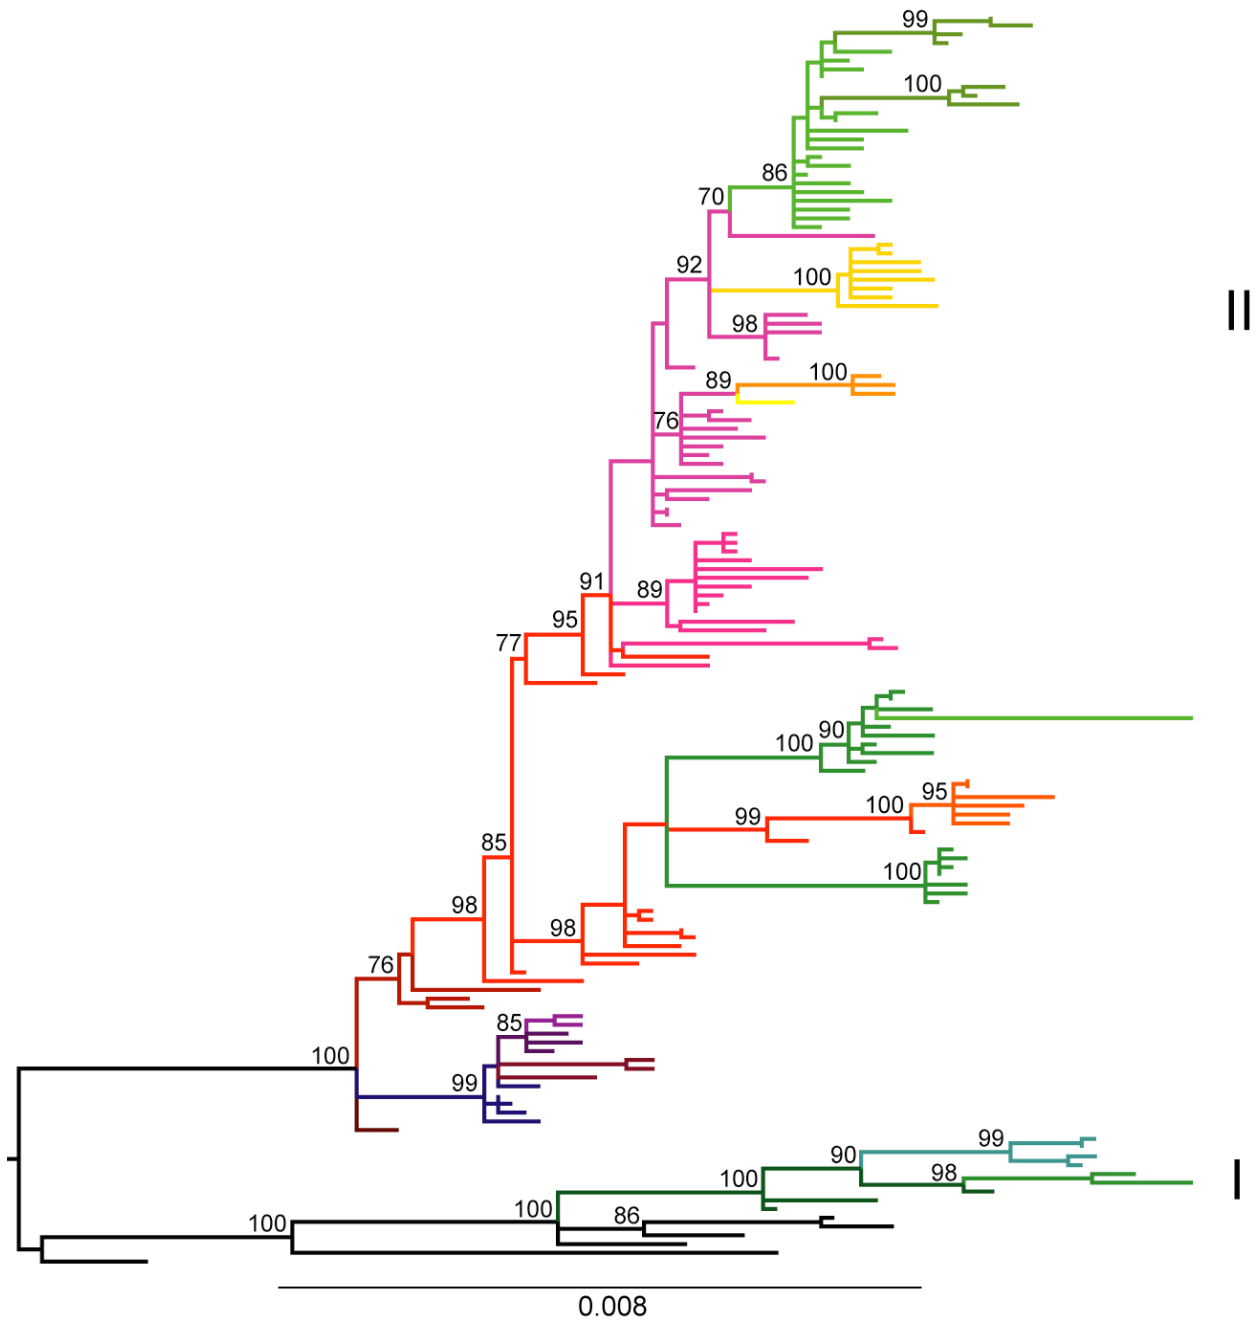



Supplementary Figure 6

NP

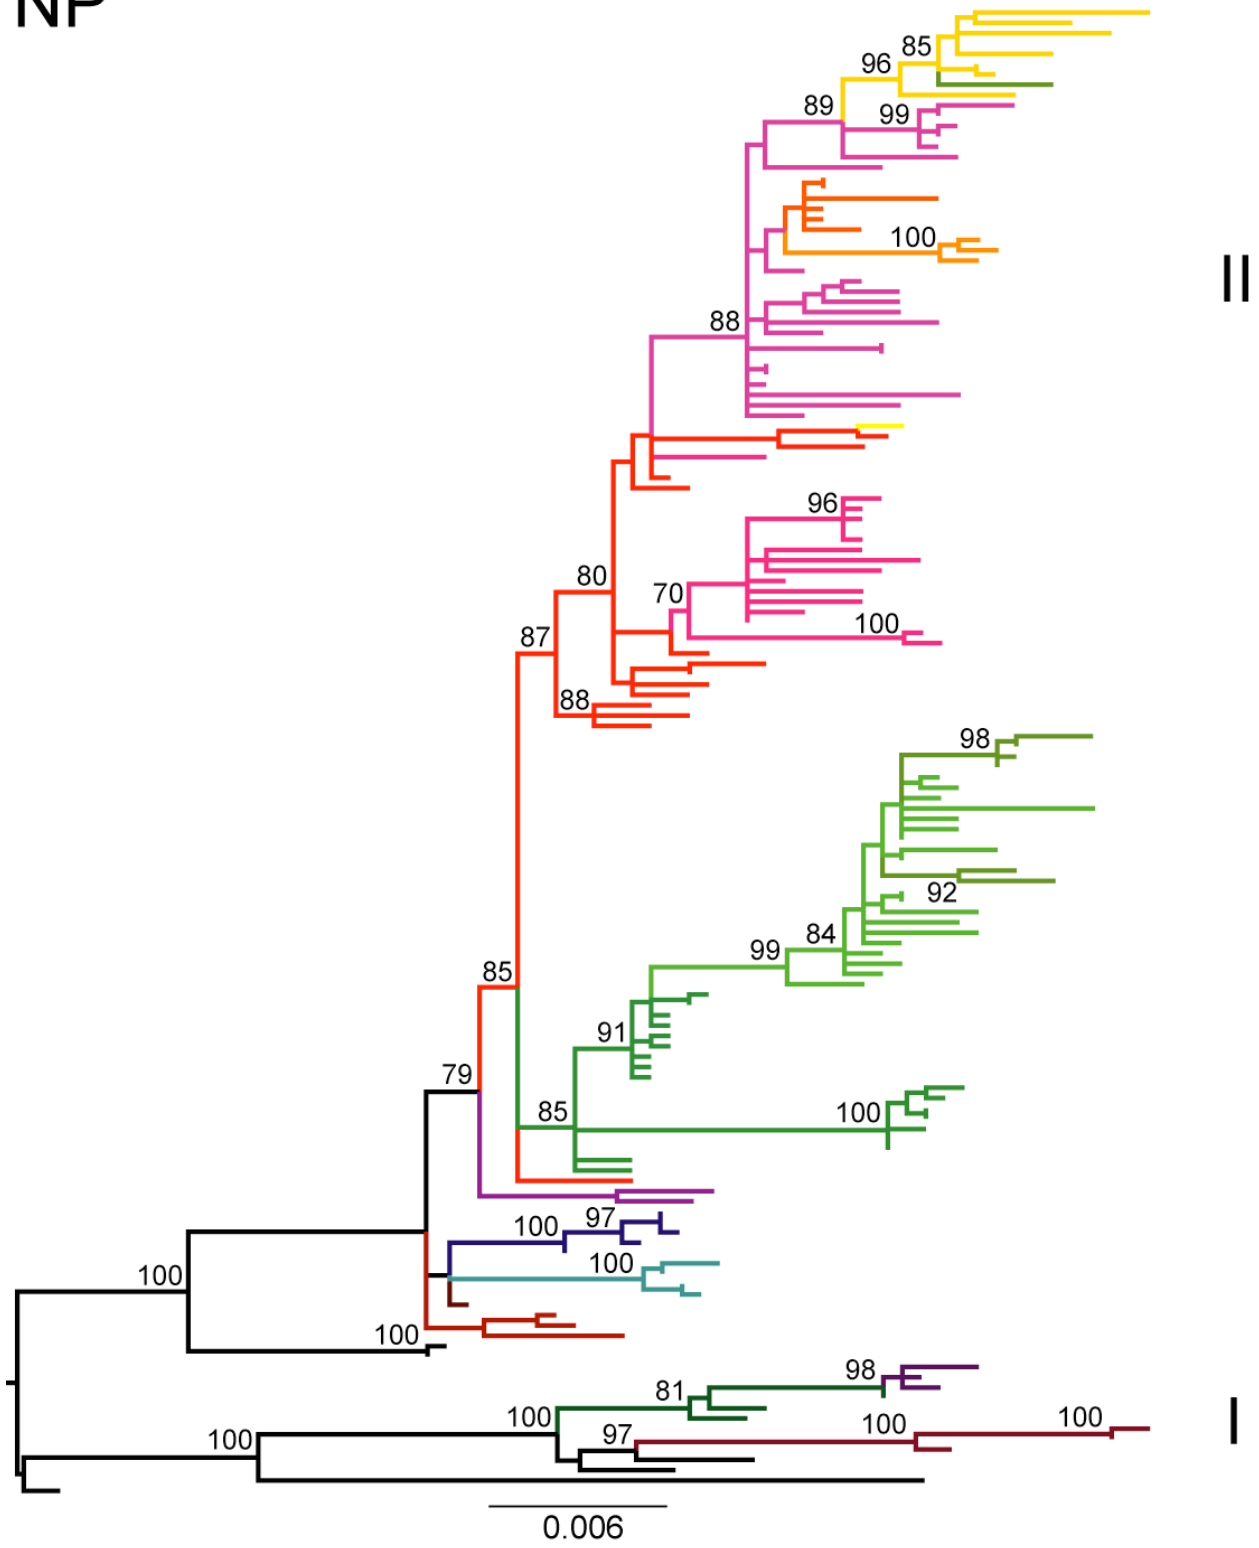

Supplementary Figure 7

M1

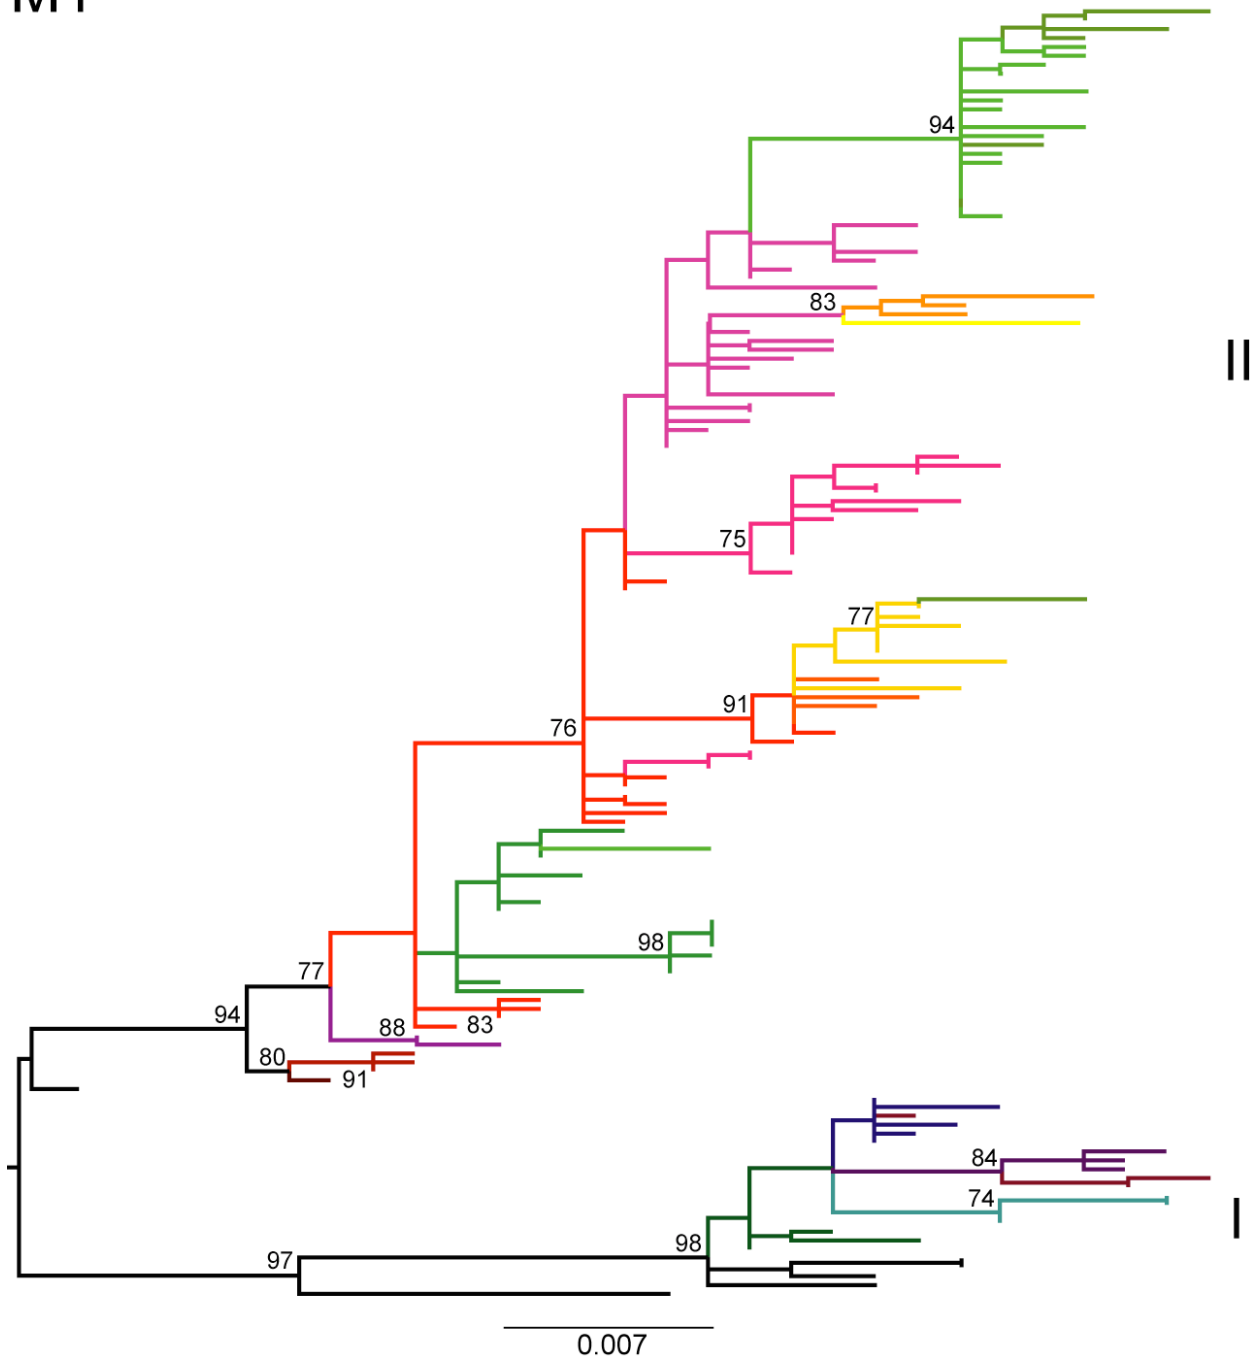

Supplementary Figure 8

## NS1

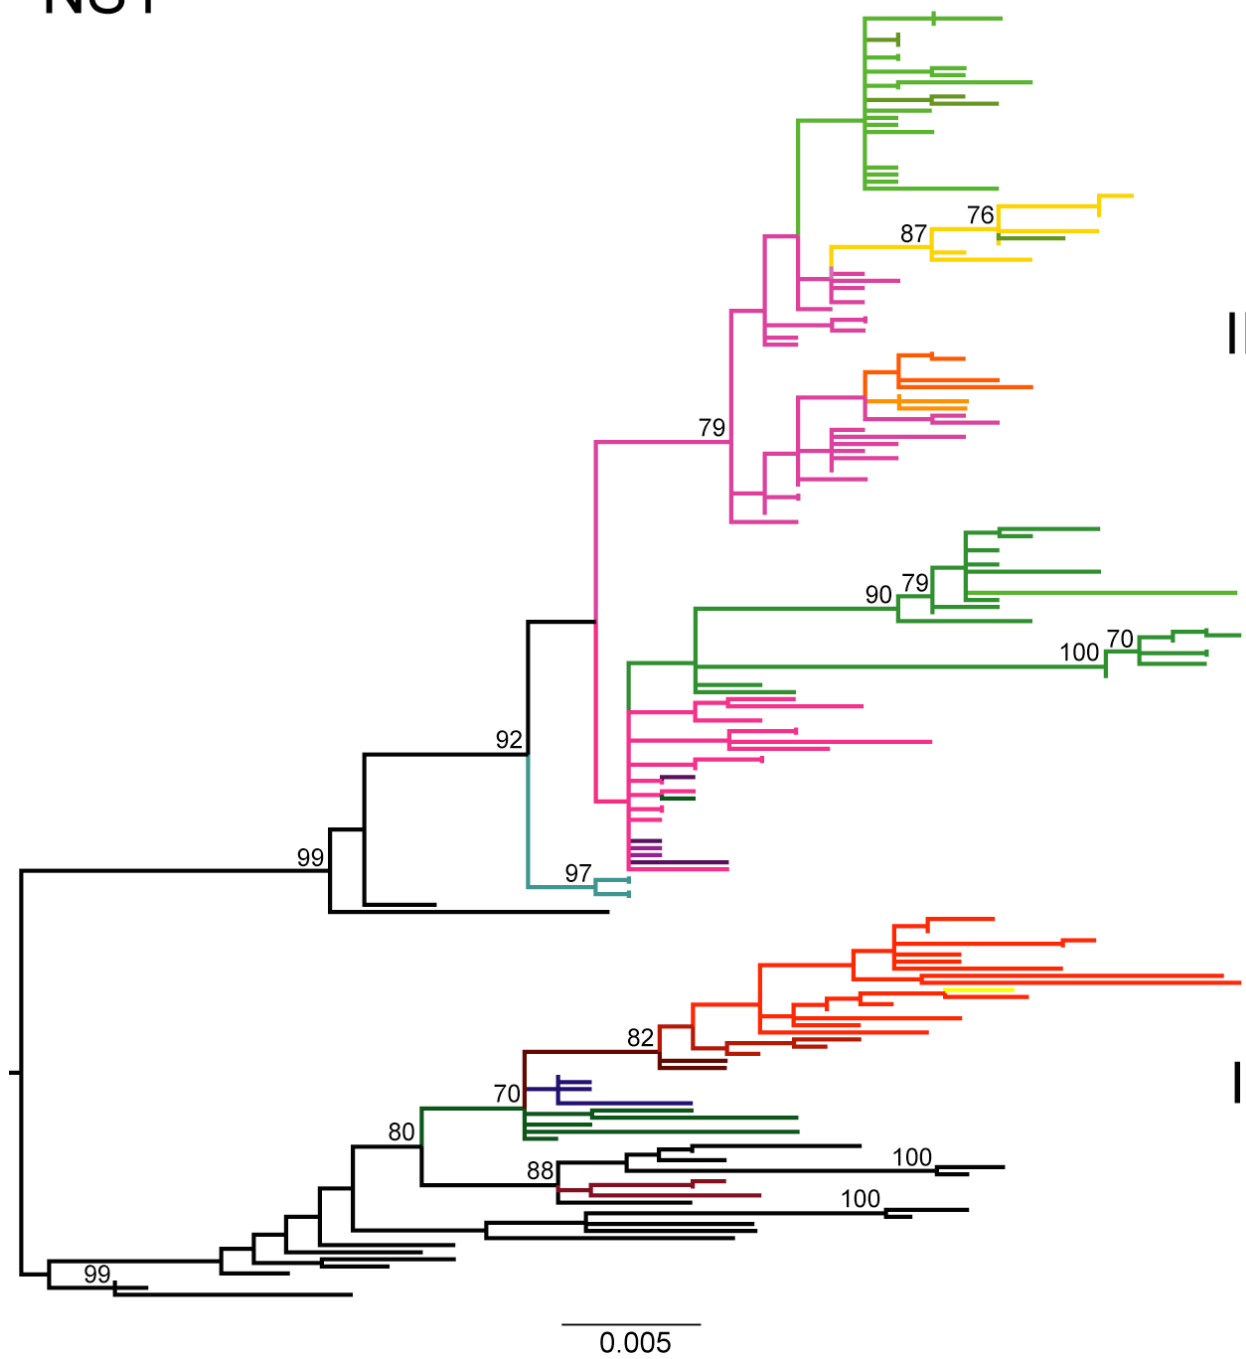

**Supplementary Table 1.** Influenza activity in USA<sup>a</sup>

| <b>Season</b> | <b>No. specimens tested</b> | <b>No. H1N1/H1N2</b> | <b>No. H3N2</b> | <b>No. B</b> | <b>Prevalence H1N1/H1N2</b> | <b>Prevalence H3N2</b> | <b>Prevalence B</b> | <b>Overall %</b> |
|---------------|-----------------------------|----------------------|-----------------|--------------|-----------------------------|------------------------|---------------------|------------------|
| 1976-77       | 17,600                      | 3                    | 212             | 633          | 0.00%                       | 1.20%                  | 3.60%               | 0.048            |
| 1977-78       | 18,727                      | 311                  | 1617            | 5            | 1.70%                       | 8.60%                  | 0.00%               | 0.103            |
| 1978-79       | 13,275                      | 1140                 | 1               | 21           | 8.60%                       | 0.00%                  | 0.20%               | 0.088            |
| 1979-80       | 15,195                      | 20                   | 17              | 1298         | 0.10%                       | 0.10%                  | 8.50%               | 0.088            |
| 1980-81       | 16,128                      | 315                  | 1125            | 1            | 2.00%                       | 7.00%                  | 0.00%               | 0.089            |
| 1981-82       | 14,804                      | 143                  | 0               | 461          | 1.00%                       | 0.00%                  | 3.10%               | 0.041            |
| 1982-83       | 16,929                      | 165                  | 1263            | 160          | 1.00%                       | 7.50%                  | 0.90%               | 0.094            |
| 1983-84       | 16,111                      | 1059                 | 79              | 937          | 6.60%                       | 0.50%                  | 5.80%               | 0.129            |
| 1984-85       | 15,355                      | 2                    | 1977            | 53           | 0.00%                       | 12.90%                 | 0.30%               | 0.132            |
| 1985-86       | 20,234                      | 2                    | 554             | 1789         | 0.00%                       | 2.70%                  | 8.80%               | 0.116            |
| 1986-87       | 22,056                      | 2206                 | 5               | 11           | 10.00%                      | 0.00%                  | 0.00%               | 0.101            |
| 1987-88       | 26,258                      | 167                  | 1776            | 354          | 0.60%                       | 6.80%                  | 1.30%               | 0.087            |
| 1988-89       | 29,357                      | 2234                 | 359             | 2530         | 7.60%                       | 1.20%                  | 8.60%               | 0.175            |
| 1989-90       | 29,956                      | 46                   | 3342            | 13           | 0.20%                       | 11.20%                 | 0.00%               | 0.114            |
| 1990-91       | 32,420                      | 179                  | 271             | 2732         | 0.60%                       | 0.80%                  | 8.40%               | 0.098            |
| 1991-92       | 38,557                      | 1055                 | 4854            | 47           | 2.70%                       | 12.60%                 | 0.10%               | 0.154            |
| 1992-93       | 36,233                      | 132                  | 1126            | 3081         | 0.40%                       | 3.10%                  | 8.50%               | 0.12             |
| 1993-94       | 35,597                      | 22                   | 4193            | 35           | 0.10%                       | 11.80%                 | 0.10%               | 0.119            |
| 1994-95       | 38,705                      | 62                   | 2819            | 1005         | 0.20%                       | 7.30%                  | 2.60%               | 0.1              |
| 1995-96       | 37,612                      | 2357                 | 1650            | 716          | 6.30%                       | 4.40%                  | 1.90%               | 0.126            |
| 1996-97       | 39,183                      | 0                    | 5047            | 1449         | 0.00%                       | 12.90%                 | 3.70%               | 0.166            |
| 1997-98       | 99,072                      | 6                    | 3241            | 102          | 0.01%                       | 3.27%                  | 0.10%               | 0.131            |
| 1998-99       | 102,105                     | 30                   | 2607            | 3370         | 0.03%                       | 2.55%                  | 3.30%               | 0.142            |
| 1999-00       | 106,768                     | 153                  | 3715            | 97           | 0.14%                       | 3.48%                  | 0.09%               | 0.138            |
| 2000-01       | 86,534                      | 2028                 | 95              | 4583         | 2.34%                       | 0.11%                  | 5.30%               | 0.114            |

|         |         |      |      |       |       |       |       |       |
|---------|---------|------|------|-------|-------|-------|-------|-------|
| 2001-02 | 98,570  | 83   | 3996 | 1705  | 0.08% | 4.05% | 1.73% | 0.155 |
| 2002-03 | 94,966  | 2534 | 847  | 4703  | 2.67% | 0.89% | 4.95% | 0.116 |
| 2003-04 | 127,316 | 2    | 7188 | 232   | 0.00% | 5.65% | 0.18% | 0.193 |
| 2004-05 | 149,131 | 16   | 5780 | 5591  | 0.01% | 3.88% | 3.75% | 0.154 |
| 2005-06 | 135,973 | 420  | 5228 | 3,211 | 0.31% | 3.84% | 2.36% | 0.126 |
| 2006-07 | 170,452 | 3847 | 2188 | 4753  | 2.26% | 1.28% | 2.79% | 0.135 |

<sup>a</sup>Data from 1976-77 season to 1996-97 season were taken from: Viboud C, Bjørnstad ON, Smith DL, Simonsen L, Miller MA, Grenfell BT. 2006. Synchrony, waves, and spatial hierarchies in the spread of influenza. *Science*. 312:447-451.  
Data from 1997-1998 season until present were taken from CDC website <http://www.cdc.gov/flu/weekly/fluactivity.htm>.
